# Supplementary material
Source: PubMed Central journal article supplement (PMC4172335)

**A**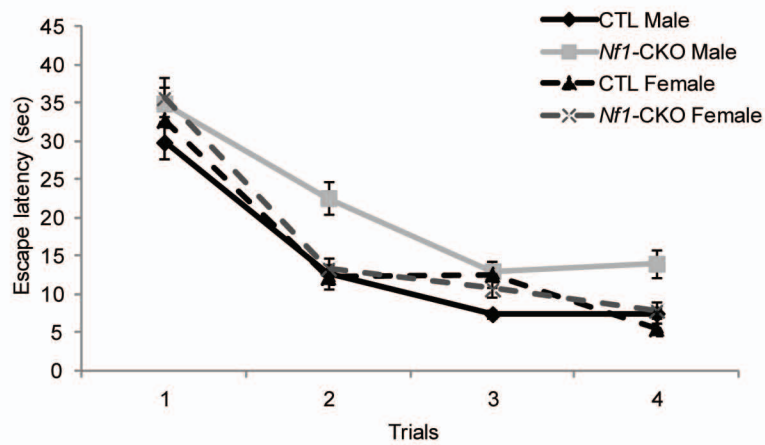**B**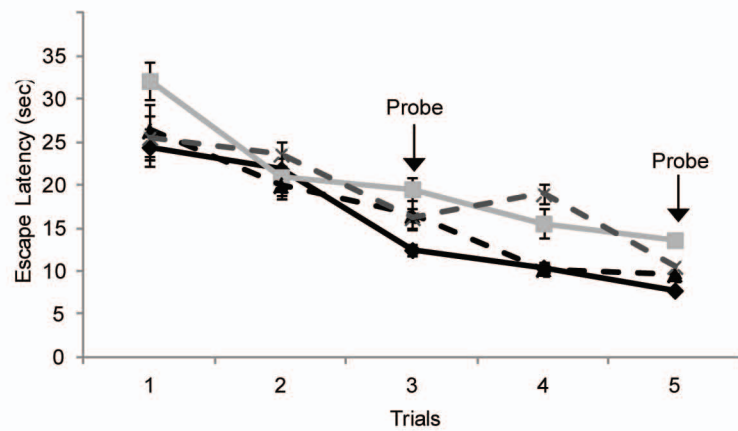**C**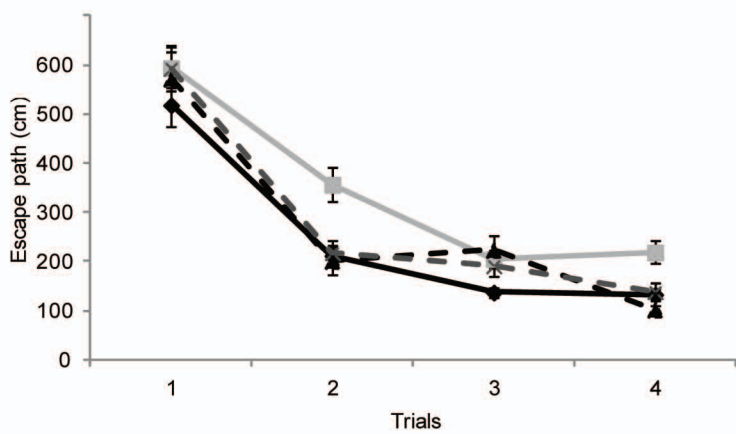**D**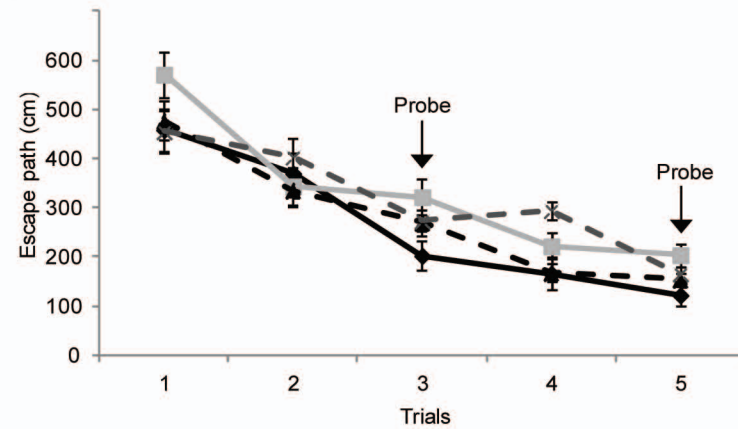**E**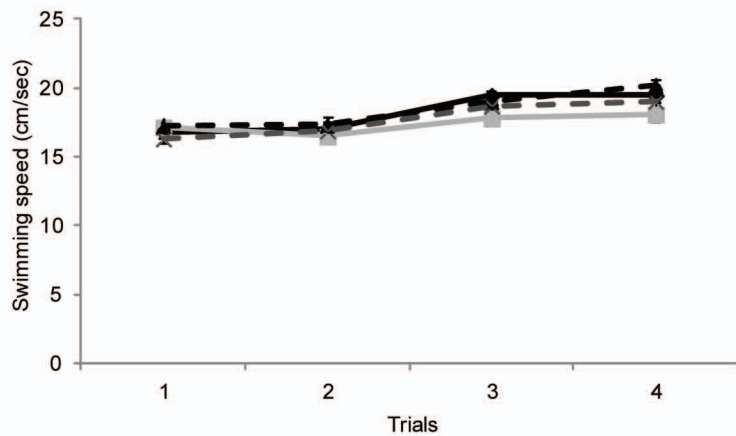**F**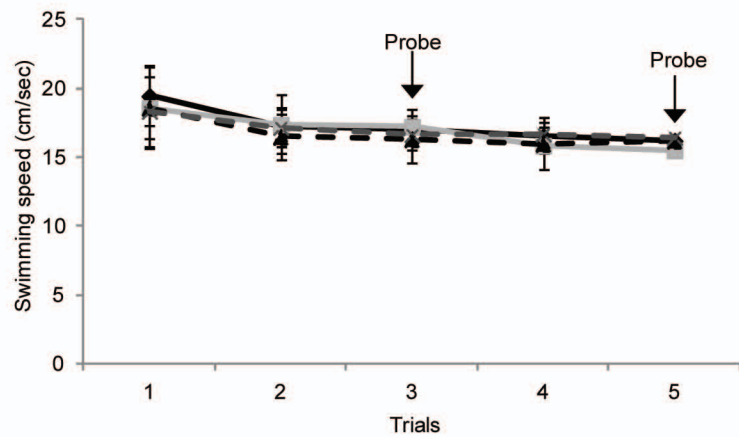

**A**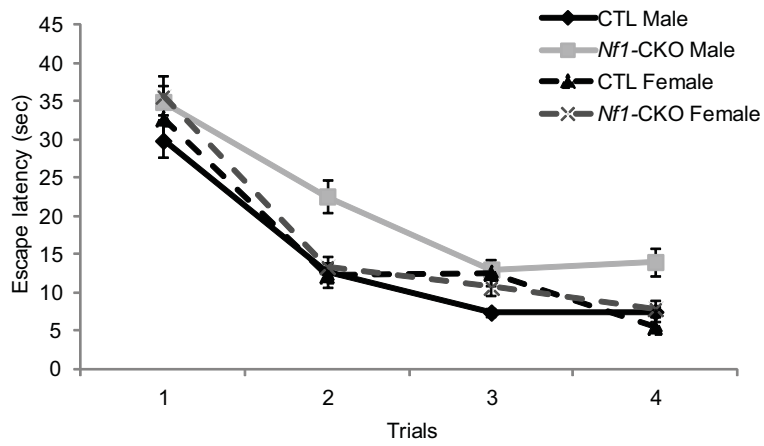**B**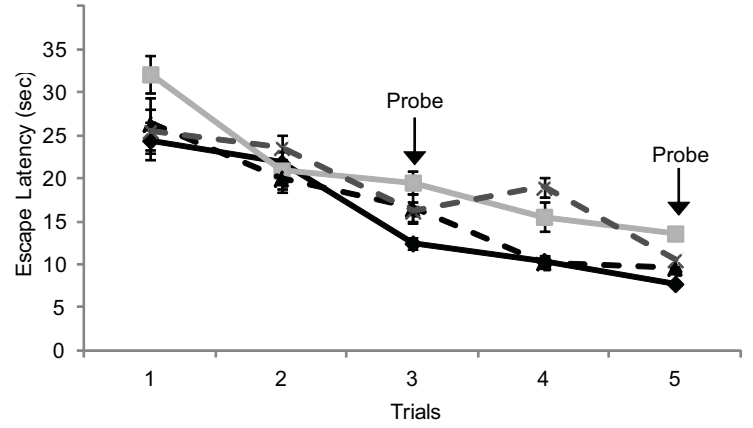**C**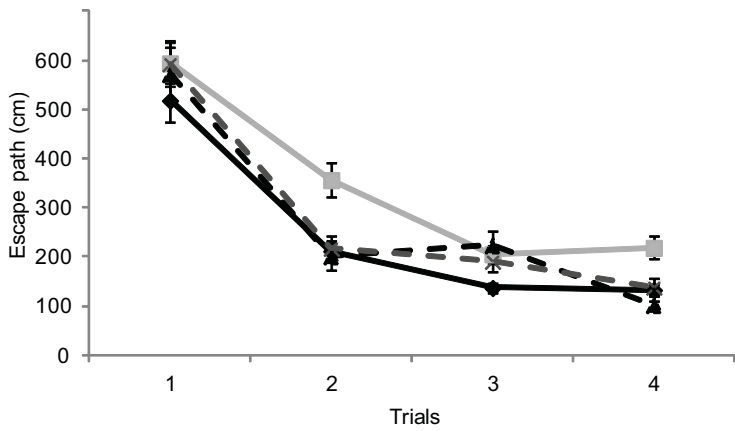**D**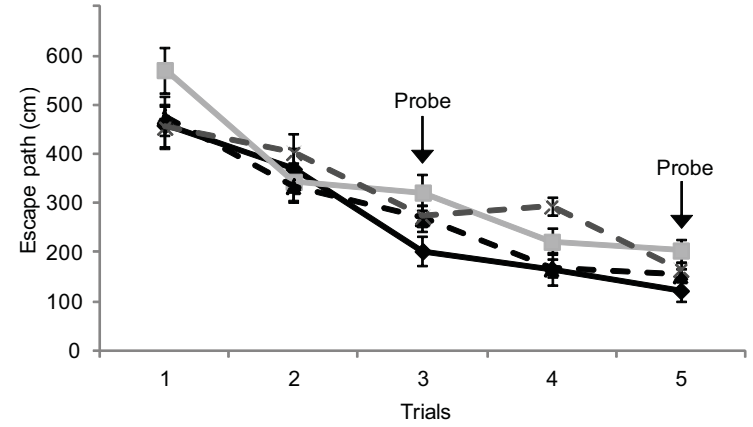**E**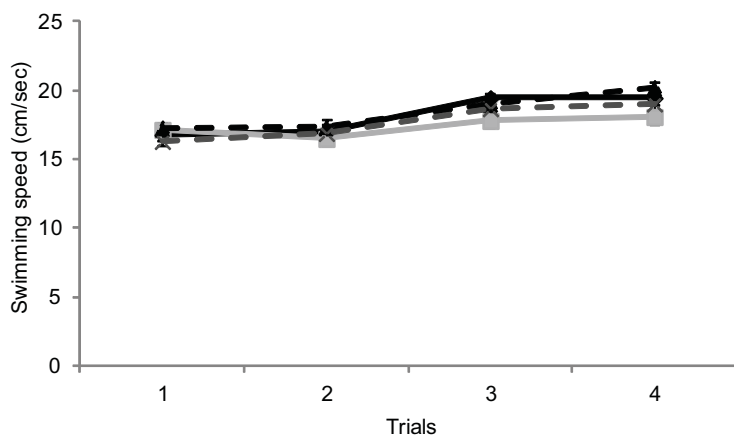**F**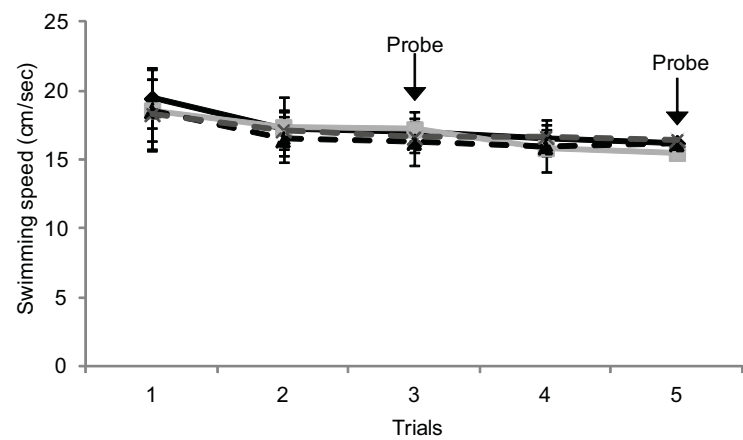

Supplement: NIHMS627380-supplement-Supp_FigureS1-S2.pdf [file NIHMS627380-supplement-Supp_FigureS1-S2.pdf]
